# Supplementary material for: Genomic Mapping of Epidermal Growth Factor Receptor and Mesenchymal–Epithelial Transition-Up-Regulated Tumors Identifies Novel Therapeutic Opportunities
Source: MDPI journal article supplement (doi:10.3390/cancers15123250), 2023-06-20
Supplement: s1 [file s1]

| Tumor                               | Gen  | Treatment  | FDR (%) | HR   | p value |
|-------------------------------------|------|------------|---------|------|---------|
| Bladder (n = 90)                    | EGFR | anti-PD-1  | 100     | 0.52 | 0.1866  |
|                                     |      | anti-PD-L1 | 100     | 0.62 | 0.3575  |
|                                     | MET  | anti-PD-1  | 100     | 0.47 | 0.0926  |
|                                     |      | anti-PD-L1 | 100     | 0.52 | 0.1493  |
| Esophageal adenocarcinoma (n = 103) | EGFR | anti-PD-1  | -       |      |         |
|                                     |      | anti-PD-L1 | 1       | 0.27 | 0.0003  |
|                                     | MET  | anti-PD-1  | -       |      |         |
|                                     |      | anti-PD-L1 | 100     | 0.43 | 0.0758  |
| Glioblastoma (n = 28)               | EGFR | anti-PD-1  | 20      | 2.96 | 0.0193  |
|                                     |      | anti-PD-L1 | -       |      |         |
|                                     | MET  | anti-PD-1  | 100     | 2.26 | 0.0816  |
|                                     |      | anti-PD-L1 | -       |      |         |
| Hepatocellular carcinoma (n = 22)   | EGFR | anti-PD-1  | -       |      |         |
|                                     |      | anti-PD-L1 | -       |      |         |
|                                     | MET  | anti-PD-1  | -       |      |         |
|                                     |      | anti-PD-L1 | -       |      |         |
| HNSCC (n = 110)                     | EGFR | anti-PD-1  | -       |      |         |
|                                     |      | anti-PD-L1 | -       |      |         |
|                                     | MET  | anti-PD-1  | -       |      |         |
|                                     |      | anti-PD-L1 | -       |      |         |
| Melanoma (n = 570)                  | EGFR | anti-PD-1  | over 50 | 0.67 | 0.0109  |
|                                     |      | anti-PD-L1 | -       |      |         |
|                                     | MET  | anti-PD-1  | 20      | 1.7  | 0.0014  |
|                                     |      | anti-PD-L1 | -       |      |         |
| NSCLC (n = 21)                      | EGFR | anti-PD-1  | 100     | 1.64 | 0.3519  |
|                                     |      | anti-PD-L1 | -       |      |         |
|                                     | MET  | anti-PD-1  | -       |      |         |
|                                     |      | anti-PD-L1 | -       |      |         |
| NSLC (n = 22)                       | EGFR | anti-PD-1  | -       |      |         |
|                                     |      | anti-PD-L1 | -       |      |         |
|                                     | MET  | anti-PD-1  | -       |      |         |
|                                     |      | anti-PD-L1 | -       |      |         |
| Urothelial (n = 348)                | EGFR | anti-PD-1  | -       |      |         |
|                                     |      | anti-PD-L1 | 100     | 1.26 | 0.0743  |
|                                     | MET  | anti-PD-1  | -       |      |         |
|                                     |      | anti-PD-L1 | over 50 | 1.47 | 0.0168  |

**Supplementary table 1 Kaplan-Meier survival values of EGFR and MET in patients treated with anti PD1 and anti PD-L1.** Table includes the fold discovery rate (FDR), the hazard ratio (HR), and p-value for several tumors. Studies with not enough samples to perform the analysis are marked with a hyphen.
